# Supplementary material for: Trends in Mortality Due to Myocardial Infarction, Stroke, and Pulmonary Embolism in Patients Receiving Dialysis
Source: PubMed Central journal article supplement (PMC9016490; doi:10.1001/jamanetworkopen.2022.7624), 2022-04-18
Supplement: jamanetwopen-e227624-s001.pdf [file jamanetwopen-e227624-s001.pdf]

## Supplemental Online Content

Ocak G, Boenink R, Noordzij M, et al. Trends in mortality due to myocardial infarction, stroke, and pulmonary embolism in patients receiving dialysis. *JAMA Netw Open*. 2022;5(4):e227624. doi:10.1001/jamanetworkopen.2022.7624

**eFigure 1.** Age and Sex Distribution of Patients Receiving Dialysis and the General Population

**eFigure 2.** Incidence of Fatal Myocardial Infarction in Patients Receiving Dialysis and the General Population

**eFigure 3.** Incidence of Fatal Stroke in Patients Receiving Dialysis and the General Population

**eFigure 4.** Incidence of Fatal Pulmonary Embolism in Patients Receiving Dialysis and the General Population

**eFigure 5.** Incidence of Causes of Death Other Than Myocardial Infarction, Stroke and Pulmonary Embolism in Patients Receiving Dialysis and the General Population

This supplemental material has been provided by the authors to give readers additional information about their work.

eFigure 1. Age and Sex Distribution of Patients Receiving Dialysis and the General Population

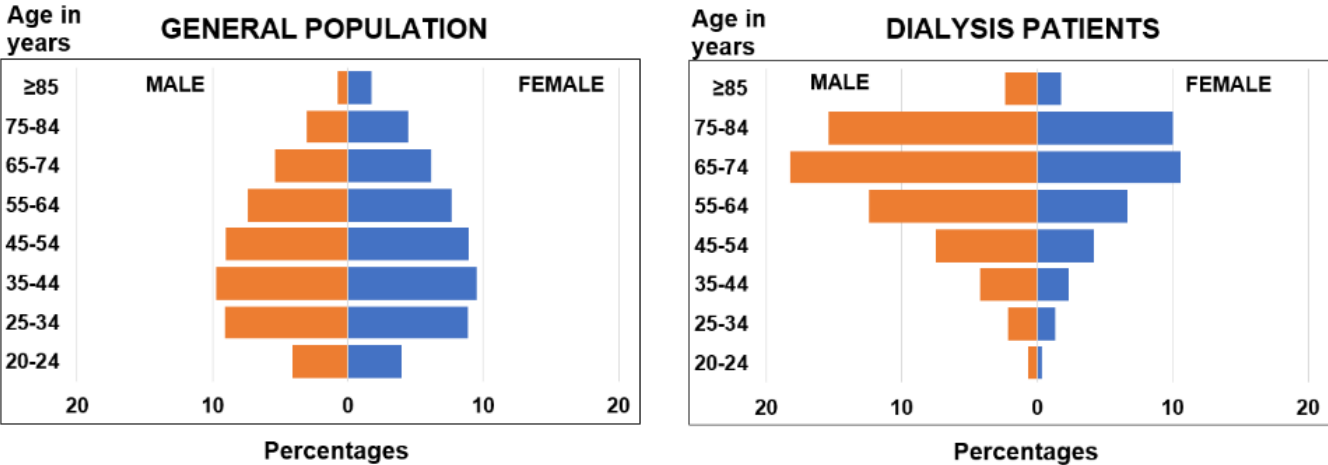

eFigure 2. Incidence of Fatal Myocardial Infarction in Patients Receiving Dialysis and the General Population

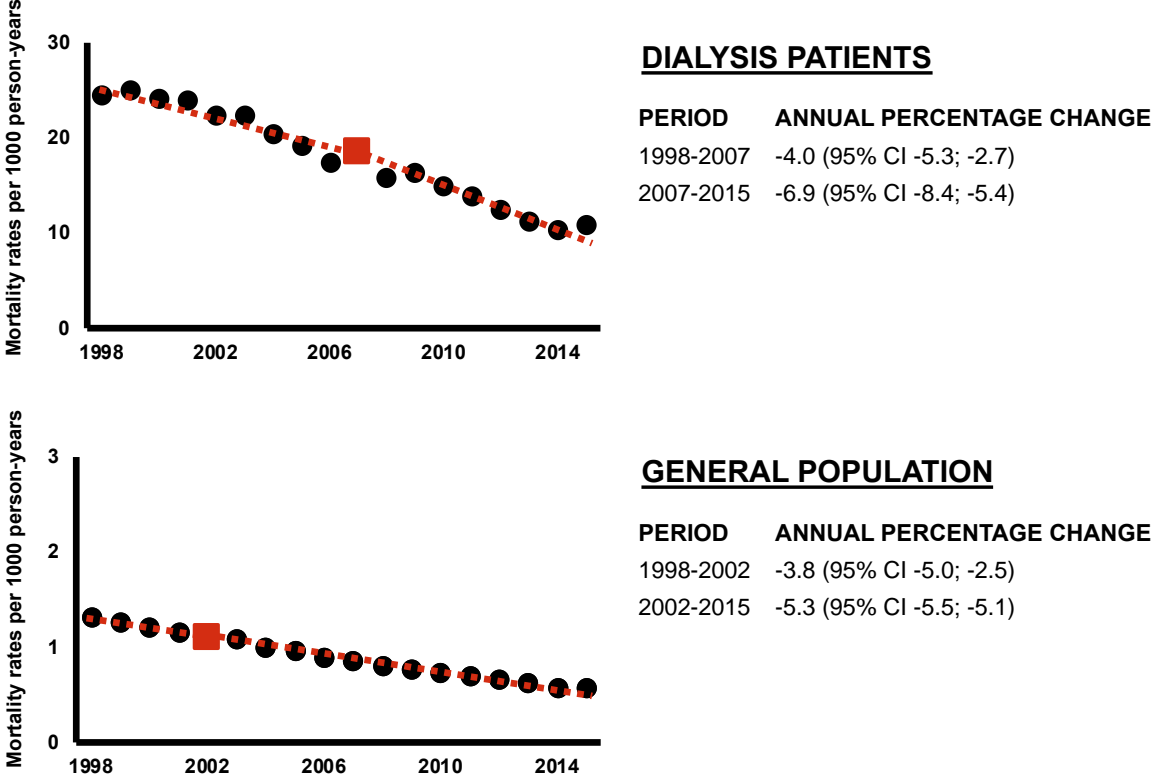

Squares represent joinpoints.

eFigure 3. Incidence of Fatal Stroke in Patients Receiving Dialysis and the General Population

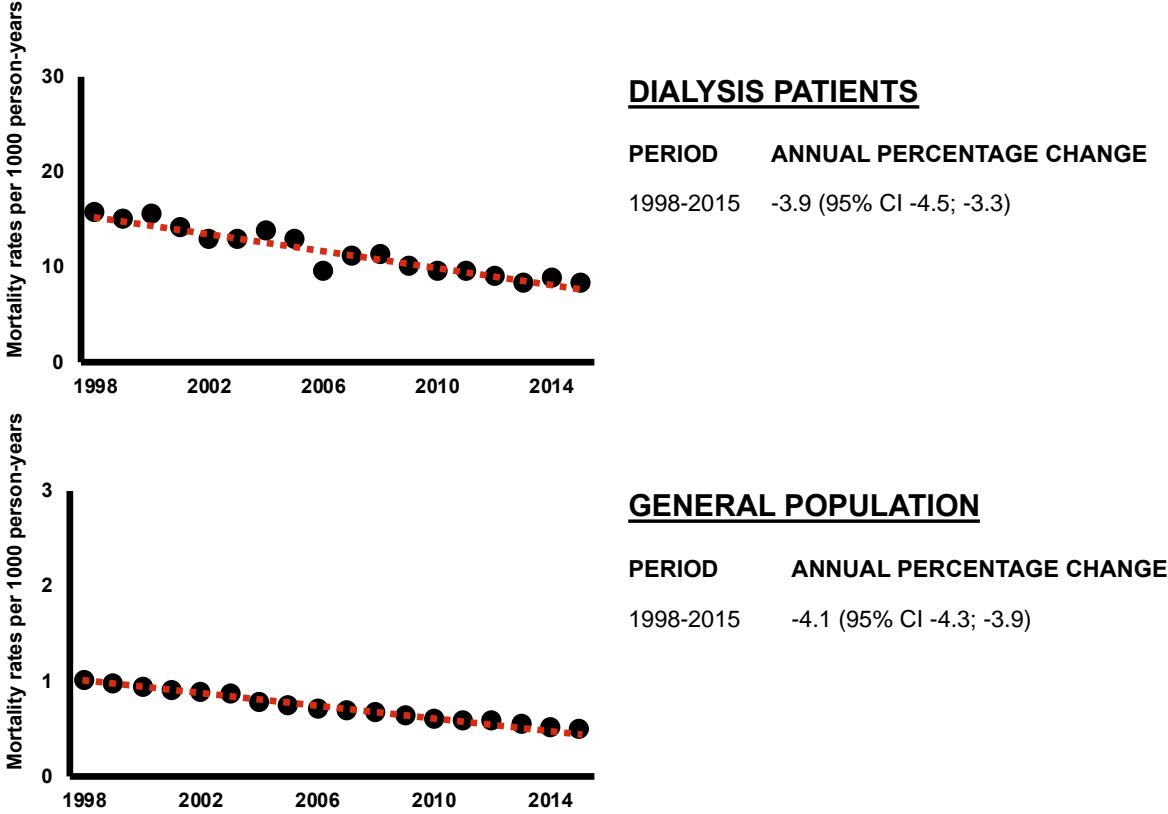

eFigure 4. Incidence of Fatal Pulmonary Embolism in Patients Receiving Dialysis and the General Population

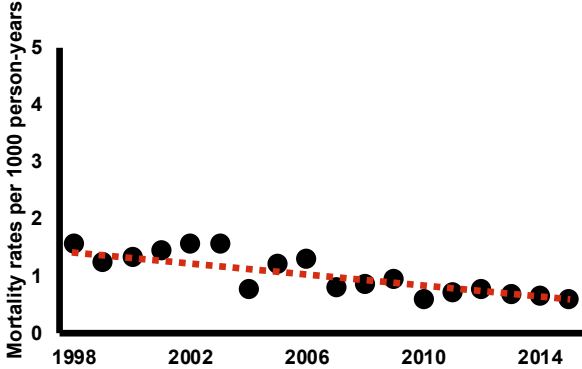

**DIALYSIS PATIENTS**

PERIOD    ANNUAL PERCENTAGE CHANGE  
1998-2015    -5.6 (95% CI -7.2; -3.9)

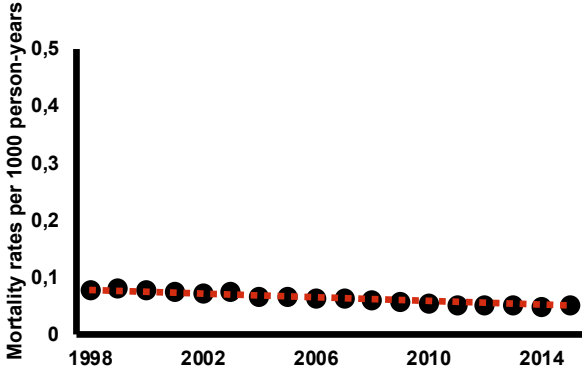

**GENERAL POPULATION**

PERIOD    ANNUAL PERCENTAGE CHANGE  
1998-2015    -3.2 (95% CI -3.4; -2.9)

eFigure 5. Incidence of Causes of Death Other Than Myocardial Infarction, Stroke and Pulmonary Embolism in Patients Receiving Dialysis and the General Population

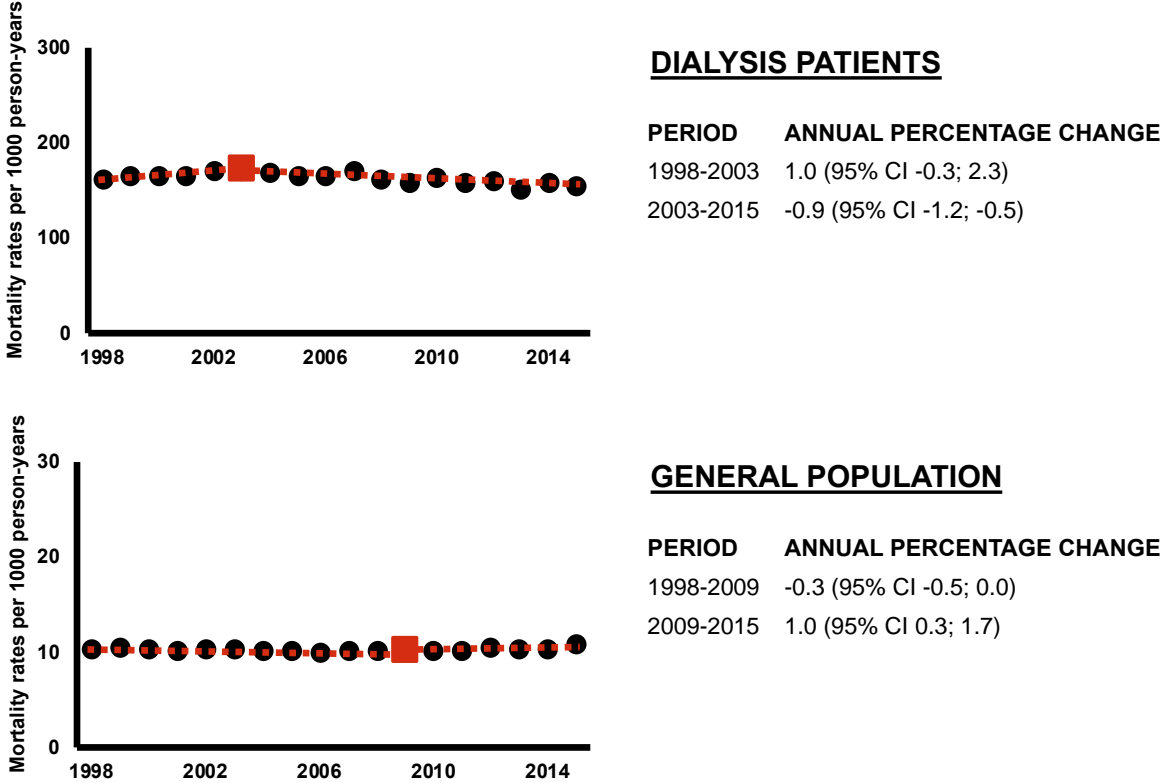

Squares represent joinpoints.
